## **Impacts of the 1918 flu on survivors' nutritional status: a double quasi-natural experiment**

Alberto Palloni<sup>1</sup>  
Mary McEniry<sup>1¶</sup>  
Yiyue Huangfu<sup>1¶</sup>  
Hiram Beltran-Sanchez<sup>2¶</sup>

# Corresponding author E-mail: [palloni@ssc.wisc.edu](mailto:palloni@ssc.wisc.edu) (AP)

¶These authors contributed equally to this work.

<sup>1</sup> Center for Demography and Health of Aging, University of Wisconsin-Madison

<sup>2</sup> Center for Population Research, University of California-Los Angeles

## ABSTRACT

A unique set of events that took place in Puerto Rico during 1918-1919 generated conditions of a “double “quasi-natural experiment. We exploit these conditions to empirically identify effects of exposure to the 1918 flu pandemic, those of the devastation left by an earthquake-tsunami that struck the island in 1918, and those associated with the joint occurrence of these events. We use geographic variation to identify the effects of the quake and timing of birth variation to identify those of the flu. In addition, we use markers of nutritional status gathered in a nationally representative sample of individuals aged 75 and older in 2002. This unique data set enables to make two distinct contributions. First, unlike most fetal-origins research that singles out early nutritional status as a *determinant of adult health*, we test the hypothesis that the 1918 flu had deleterious effects on the nutritional status on adult survivors who at the time of the flu were *in utero* or infants. Second, and unlike most research on the effects of the flu, we focus on markers of nutritional status set when the adult survivors were children or adolescents. We find that estimates of effects of the pandemic are sizeable primarily among females and among those who, in addition to the flu, *were exposed to the earthquake-tsunami*. We argue that these findings constitute empirical evidence supporting the conjecture that effects of the 1918 flu alone and the combined effects of the flu and the earthquake are associated not just with damage experienced during the fetal period but also postnatally.

**Key words:** 1918 flu pandemic, earthquake, nutritional status, older adults, Puerto Rico

## 1 INTRODUCTION

2 The Spanish flu virus of 1918-19 is an example of a perfect storm: like HIV and unlike  
3 ordinary standard seasonal influenza, it was highly lethal but, unlike HIV and like other  
4 influenza, it was rapidly and efficiently spread <sup>(1-5)</sup>. The combination of these two traits made the  
5 pandemic one of the deadliest in human history <sup>(6, 7)</sup>. In most of the world the A/H1N1 influenza  
6 was characterized by its unusual temporal sequence, peculiar age pattern, and case morbidity and  
7 lethality <sup>(1, 8, 9)</sup>. The manifestation of the pandemic in Puerto Rico followed the world pattern  
8 closely but, as we will see later, it added unique features. Jointly, the age pattern of incidence  
9 and morbidity and mortality levels, created unfavorable conditions for all but especially for  
10 women of childbearing ages and those who were pregnant at the time or who had recently given  
11 birth <sup>(10, 11)</sup>. These conditions may have compromised not just fetal growth but also infant and  
12 young children' health, both highly dependent on maternal health status and parental care.

13 As if the onslaught of the flu had not been enough, on October of 1918, precisely when  
14 the pandemic was gathering force during its second, most lethal wave, a strong earthquake (the  
15 San Fermin earthquake) struck the Western part of the island. This was immediately followed by  
16 a tsunami, two major aftershocks in a two-month interval following the earthquake, and multiple  
17 smaller ones spread over the subsequent year or so <sup>(12)</sup>

18 A large body of research on the lasting effects of the 1918 pandemic relies on the fact  
19 that the event can be considered a quasi-experiment: it was unexpected, difficult to avoid and, in  
20 most cases, there were no contemporaneous exogenous events that could have produced similar  
21 outcomes<sup>(1, 10)</sup>. The Puerto Rican earthquake was also unexpected, hard to avoid in areas struck  
22 by it and, besides from the flu pandemic, unaccompanied by other major events that could have

23 injured with equal violence an already vulnerable population. Thus, in one stroke, an unlikely  
24 combination of two events handed us conditions of a unique double quasi experiment.

25         This paper departs from others on effects of 1918 flu pandemic. First, it seeks to shed  
26 light on a rather unexplored dimension of the 1918 pandemic, namely, its effects on *markers of*  
27 *nutritional status* of individuals exposed to it. With the exception of one study <sup>(10)</sup>, we know of  
28 no other attempt to investigate such an association. Analyses of impacts on the nutritional status  
29 of 1918 flu survivors requires to focus on mechanisms that could disturb physiological growth  
30 and developmental processes during infancy, early childhood and even early adolescence, not  
31 just those that operate *in utero*. It is known that embryonic and, more generally, intrauterine  
32 disruptions influence neural development (brain tissue), metabolic balance (pancreas, liver),  
33 nephron growth (kidneys and regulation of blood pressure) or lung and heart functioning <sup>(13-16)</sup>.  
34 In addition, embryonic and fetal development is also about growth of cartilage, bone and muscle  
35 tissue, all of which are implicated in subsequent postnatal physical development <sup>(17)</sup>. In addition,  
36 impairment of growth processes that occur during the fetal period can be aggravated if postnatal  
37 conditions deteriorate. Thus, fetal growth could be impaired when pregnant mothers experience  
38 illnesses and are exposed to either episodic or chronic stress. By the same token, when due to  
39 illnesses or death, mothers cannot breastfeed normally, are unable to provide sufficient maternal  
40 care, proper nutrition, grooming, and hygiene, early growth and development could go astray.  
41 Furthermore, when infants and young children face prolonged exposure to adverse  
42 environmental and material conditions, catch-up growth may be a non-starter <sup>(18, 19)</sup>. This  
43 justifies the need to assess not just the 1918 flu 's impacts of in *in-utero* exposure, but also those  
44 closely associated with adverse postnatal conditions.

45           Second, we build the case on a unique quasi-experimental research design, a product of  
46 the occurrence of two simultaneous events, one involving *timing of exposure* (flu) and the other  
47 involving *timing and geography of exposure* (flu and regional earthquake-tsunami). We aim to  
48 show that the flu pandemic and the earthquake-tsunami combine to generate impacts that neither  
49 of these events could have produced separately and are strongly associated with both gestational  
50 and postnatal exposures.

### 51 **Early physical growth debilitation and its long run consequences**

52           Human physical growth depends on early embryonic and fetal events, maternal exposures  
53 (including stressors), maternal health status, and parental effects, including maternal capacity to  
54 nourish during the fetal and postnatal stages<sup>(20-22)</sup>. Of particular importance is the length and  
55 intensity of breastfeeding<sup>(23-25)</sup>, protection from infections and parasitic diseases<sup>(26)</sup>, recovery  
56 from illness<sup>(27, 28)</sup> and reduction of environmental stressors<sup>(29)</sup>. These parental effects are  
57 strongly associated with maternal (and paternal) health status, household (family) environments  
58 and access to resources.

#### 59 *Embryonic and fetal growth*

60           By and large, fetal nutrition depends on maternal diet and placental capacity to deliver  
61 nutrients (including oxygen, fat, proteins, hormones, SCFA)<sup>(30)</sup>. It is well-known that maternal  
62 nutritional status influences the entire process of fetal development and can have strong impacts  
63 of the infant's subsequent growth<sup>(31)</sup>. It is also known that poor maternal health status can derail  
64 the normal course of a pregnancy and complicate delivery. In particular, maternal infections  
65 during pregnancy could compromise normal fetal development and their ultimate impacts  
66 depend on the timing of infections, their intensity, and duration. These effects are also associated

67 with inflammatory responses triggered by the infections. In addition to the potentially fetal  
68 organogenic damage associated with the flu-related cytokine storms<sup>(2, 32)</sup>, bouts of maternal  
69 hyperthermia induced by inflammation can also lead to deleterious outcomes, including  
70 miscarriages, premature labor, stillbirths, congenital anomalies, and growth restrictions<sup>(33-35)</sup>.  
71 The latter are a result of irregularities of the physiology of bone and muscle tissues formation as  
72 bone develops from embryonic mesoderm and proceeds by ossification of cartilage tissue formed  
73 from mesenchyme. Maternal hyperthermia can also affect limb myogenesis as it disrupts and  
74 delays the involvement of several crucial regulatory factors<sup>(35)</sup>. Jointly, dysregulation of bone and  
75 muscle tissue formation can compromise normal physical growth<sup>(36)</sup>.

76 *Early and late infant development:*

77 Because of mother's milk properties, intensity and length of breastfeeding are of crucial  
78 importance for infants' early growth, particularly during the first 6 months of life<sup>(37)</sup>. Aside from  
79 its beneficial nutritional properties<sup>(38)</sup>, breastmilk contains important compounds that strengthen  
80 infants' immune response and act as a shield to reduce risks of disease<sup>(39)</sup>. Most viral, bacterial  
81 and parasitic diseases reduce appetite, limit food intake and impair the child's nutrient absorption  
82 capabilities<sup>(40)</sup>. Thus, the combination of illnesses and breastfeeding interruption, cessation, or  
83 irregularities during the first 6 months can compromise not only the quality and quantity of  
84 nutrients available for early growth but also reduce absorption and metabolization of those  
85 available<sup>(41)</sup>. These disruptions compromise the ability of an organism to satisfy energetic  
86 demands to sustain rapid cell division and specialization and organ growth and formation during  
87 critical periods<sup>(30)</sup>. Although early growth faltering can be offset by subsequent catch-up growth  
88 phases, this will not take place in the absence of material conditions that can sustain rapid growth  
89 and maturation<sup>(19, 42)</sup>. In populations with widespread poverty and vulnerable maternal health

90 status, the process of catch-up growth may never get off the ground and children who could have  
91 benefitted from it will fail to attain physical growth milestones<sup>(42)</sup>.

## 92 **Long lasting effects of the flu**

93 These considerations lead us to hypothesize that exposure to the flu during critical periods as we  
94 define them here, e.g. *in utero* and/or during infancy, must have had non-negligible influences on  
95 early nutritional status and should be reflected in poor adult markers of physical growth. By the  
96 same token, exposure to stresses and material deprivation brought about by the earthquake-  
97 tsunami could have disrupted embryonic, fetal and postnatal growth and, as consequence,  
98 facilitated growth faltering and attainment of substandard markers of physical growth.  
99 Furthermore, as did happen in other populations, the flu effects were probably stronger among  
100 those who experienced the pandemic in areas more severely affected by it <sup>(1, 10)</sup>. Finally, both *in*  
101 *utero* and postnatal vulnerability to the flu was likely augmented by conditions associated with  
102 the earthquake<sup>(43)</sup>. If so, we should find that the impact of the flu among the "treated" by the flu  
103 (e.g. those exposed to the pandemic *in utero* or during the first year of life) and "controls" (e.g.  
104 those exposed later in childhood or adolescence) is larger among those born in areas struck by  
105 the earthquake-tsunami (e.g. "treated" by the earthquake) than among those born elsewhere in the  
106 island ("controls"). Table 1 is a stylized representation of the study design.

| Table 1: Stylized representation of study design      |                                |                                                         |
|-------------------------------------------------------|--------------------------------|---------------------------------------------------------|
|                                                       | Early Life Earthquake Exposure |                                                         |
| Early Life Flu Exposure                               | Yes (“treated”)                | No (“not treated”)                                      |
| Yes (“treated”)                                       |                                |                                                         |
| Born 1918-1919                                        | A                              | B                                                       |
| No (“controls”)                                       |                                |                                                         |
| Born before 1917                                      | C                              | D                                                       |
| Born after 1920                                       | E                              | F                                                       |
| Notes: The key contrasts we examine in the paper are: |                                |                                                         |
| (i)                                                   | A vs B; (C+E) vs (D+F)         | effects of earthquake                                   |
| (ii)                                                  | A vs (C+E)                     | effects of flu among those not born in earthquake areas |
| (iii)                                                 | A vs (D+F)                     | effects of flu among those born in earthquake areas     |
| (iv)                                                  | A vs (B+C+D+E+F)               | gross effects of the flu                                |

107

108 An ancillary issue relates to potential gender differentials of the flu effects. Although  
 109 there are behavioral mechanisms that could have exacerbated impacts among female infants (e.g.  
 110 male children preferences), gender differences may surface as a result of culling among males.  
 111 Because male embryos are more vulnerable<sup>(17)</sup> and male infants experience higher mortality  
 112 than female infants<sup>(44)</sup>, one may observe stronger effects among females than among males as a  
 113 result of selection.

## 114 MATERIALS AND METHODS

### 115 Data

116 We use PREHCO (Puerto Rican Elderly Health Conditions) data base<sup>(45)</sup>. PREHCO is a  
 117 two-wave panel of the non-institutionalized Puerto Rican population aged 60 and over and their  
 118 surviving spouses. The study uses a multistage, stratified sample of the elderly population  
 119 residing in Puerto Rico in the year 2002 with oversamples of regions heavily populated by  
 120 people of African descent and of individuals aged over 80. A total of 4,293 in-home face-to-face  
 121 target interviews were conducted between May 2002 and May 2003 and a second wave data



122 were collected during 2006-2007. The overall response rate was 93.9%. Our analyses use a  
 123 subpopulation aged 74+ at the time of first interview, e.g. those born between 1896 and 1927.  
 124 The total sample size is 1,613 observations, 956 of them females. About 30 percent of the sample  
 125 were born on or before 1917 and 11 percent between years 1918 and 1919. A histogram of the  
 126 distribution of year of birth is in Fig 1 and a summary of key statistics is in Table 2.

| <b>Table 2: Summary of selected sample statistics</b> |                |                  |
|-------------------------------------------------------|----------------|------------------|
| <b>Variable</b>                                       | <b>Percent</b> | <b>Mean (SD)</b> |
| Age                                                   |                |                  |
| 74-79                                                 | 38             |                  |
| 80-84                                                 | 33             |                  |
| 85-89                                                 | 17             |                  |
| 90+                                                   | 12             |                  |
| All                                                   |                | 82 (5.27)        |
| Gender                                                |                |                  |
| Males                                                 | 41             |                  |
| Poverty                                               |                |                  |
| Born in poor municipios                               | 40             |                  |
| Flu Severity                                          |                |                  |
| Born in high severity municipios                      | 29             |                  |
| Exposure                                              |                |                  |
| To 1918 Flu (Exposure_Flu=1)                          | 9              |                  |
| Earthquake (Exposure_earthquake=1)                    | 14             |                  |
| Knee height (cms)                                     |                | 46 (4.8)         |
| Height(cms)                                           |                | 155 (9.7)        |
| Education (years)                                     |                | 6.7 (4.9)        |
| Total N                                               | <b>1613</b>    |                  |
| Total missing anthropometry                           | 283            |                  |
| Effective sample size                                 | 1330           |                  |

127

128

**Fig 1: Distribution of year of birth**

129 **Measures**

130 *Flu exposure*

131 In contrast to other studies of the 1918 flu, we identify a wider period during which  
132 exposure is assumed to have taken place and, in addition to the fetal period, we also include time  
133 intervals during which post-natal care may have been disrupted as a consequence of the epidemic  
134 and/or the earthquake. Note that if, as we argue here, the post-natal mechanisms are also relevant  
135 for outcomes other than physical growth markers (adult health, mortality, cognition, educational  
136 attainment, etc...), studies that ignore them will underestimate the total effects. This is because  
137 when a restrictive definition of exposure is used some "treated" cases will be assumed to be  
138 "controls". To capture extended exposure including gestational and post-natal exposures we  
139 define a dummy variable attaining the value 1 if an individual's birth is reported to have taken  
140 place during 1918 or during the first six months of 1919. This indicator is a compromise between  
141 preservation of the ability to assign effects to *fetal and post-natal exposure according to timing*  
142 *and duration* , on one hand, and sample size constraints, on the other. A full rationale for this  
143 choice is provided in a lengthy description of the association between year and month of birth  
144 and type and degree of exposure to the various waves of the 1918 pandemic and earthquake.  
145 (*reference omitted to preserve anonymity*)

146 *Flu Severity*

147 Although we lack information on the incidence and case fatality of the pandemic in  
148 Puerto Rico, we follow past research and create a proxy indicator of flu severity using the excess  
149 total mortality registered during the flu period <sup>(1)</sup>. To construct an index of severity we consider  
150 total mortality during the two years period 1918-1919 for each of the 76 municipios (the smallest  
151 administrative units) in Puerto Rico, estimate expected deaths using age-specific mortality rates  
152 during 1918 in the US, and then compute the ratio of mortality rate observed in a municipio to

153 the observed rate. Note that this quantity is equivalent to an indirectly standardized mortality  
154 ratio, a conventional index computed when information of age specific death rates is absent. The  
155 information on municipio's mortality is retrieved from Luk's estimates <sup>(46)</sup>.

156 We classify as high severity all municipios above the 90<sup>th</sup> centile of the severity index  
157 distribution (details of the index construction are in S1 Text).

### 158 *Poverty*

159 We adopt the classification of municipios constructed by Clark <sup>(47)</sup>. Municipalities were  
160 grouped into three classes according to their population size, assessed value, and government  
161 income. A total of 25 municipalities are either in the wealthiest or an intermediate class and the  
162 remaining municipalities are in the poorest category. In this paper we use a 0/1 binary indicator  
163 to contrast the poorest and the remaining municipios.

### 164 *Earthquake-tsunami exposure*

165 Exposure to earthquake-tsunami is assessed according to municipio of birth. We classify  
166 these into three groups depending on the severity of the event: (i) most severe, (ii) severe and  
167 (iii) not severe. In what follows we use a 0/1 dummy variable to flag municipios in group (i).  
168 Group (i) includes the municipios of Aguada, Aguadilla, Anasco, Isabella and Mayaguez. Group  
169 (ii) includes the rest of the West Coast municipios (Cabo Rojo, Hormigueros, Rincon, San  
170 Sebastian and Quebradilla). The remaining municipios are in group (iii). This grouping is based  
171 on historical accounts of the earthquake-tsunami and is consistent with the geographic location  
172 of municipios relative to the epicenter of the earthquake and exposure to the tsunami that  
173 accompanied it.

### 174 *Knee height and adjusted height*

175           We use PREHCO's anthropometry module for the assessment of height and knee height.  
176    To attenuate biases due to skeletal compression, we adjust height measures using estimates of  
177    compression by gender and age observed in a sample of individuals who were followed for a  
178    long period of time (see S2 Text ). The magnitude of the adjustments is considerable and, if  
179    anything, they will lead to overcorrections and to downwards biases of the effects on height of  
180    exposure to events of interest. To circumvent the problem altogether we also use knee height, a  
181    marker of early nutritional status unaffected by skeletal compression. There are a number of  
182    outcomes frequently studied in the literature on the 1918 pandemic, including BMI. We do not  
183    examine these since our interest is on markers of *early* nutritional status and neither BMI nor any  
184    of other available in the survey are suitable.

## 185    **Models**

186           We use seemingly unrelated regression (SUR) and treat adjusted height and knee height  
187    as continuous variables with possibly correlated errors. We estimated three alternative classes of  
188    models, including SUR, OLS and bivariate probit. Although they all lead to the same inferences,  
189    we only discuss results associated with SUR models because they produce easily interpretable  
190    estimates, do not depend on arbitrary cut points (as bivariate probit models do), and generate  
191    more conservative standard errors than OLS.

192           The SUR model contains two equations, one for each continuous trait, with potentially  
193    different covariates in each and assumed correlated errors. While the estimates of *separate* OLS  
194    equations are consistent the estimated standard errors are inconsistent and possibly subestimated.  
195    In all cases we use our preferred measures of exposures, namely, *Exposure<sub>flu</sub>* for flu and  
196    *Earthquake Exposure* for earthquake-tsunami exposure The specification for outcome  $j=1$  (knee  
197    height) and  $j=2$  (adjusted height) is

$$Z_{ij} = \alpha_{ij} + \beta_j * C_i + \gamma_j * Exposure\_Flu_i + \varphi_j * Exposure\_Earthquake_i + \lambda_j * (Exposure\_Flu_i * Exposure\_Earthquake_i) + \varepsilon_{ij} \quad (1)$$

where  $Z_{ij}$  is the outcome of interest for individual  $i$ ,  $C_i$  is a vector of control variables for individual  $i$ ,  $Exposure\_Flu$  is a 0/1 variable for exposure to flu,  $Exposure\_Earthquake$  is a 0/1 variable for exposure to earthquake-tsunami, and  $\varepsilon_{ij}$  is an idiosyncratic error. In turn, the parameters for the equation of outcome  $j$  are a constant,  $\alpha_j$ , a vector of effects associated with controls,  $\beta_j$ , the effect of flu exposure,  $\gamma_j$ , the effect of earthquake-tsunami exposure,  $\varphi_j$ , and the effect of interaction terms,  $\lambda_j$ . The vector of control variables includes years of education (continuous) and municipio of birth's poverty level (discrete). Additional controls were discarded since they did not change results.

Three remarks are important. First, our model specification *does not* include a control for age as there is no relation between markers of nutritional status and age. Second, the regression formulation is a difference-in-difference (DiD) model that seeks to identify (i) differences in the impact of the flu by timing of exposure between high severity and low severity areas and (ii) differences in the impact of the flu by timing of exposure in geographic areas affected by the earthquake-tsunami (high severity of earthquake) and those not affected (low severity area). Unlike standard DiD models, we are estimating differences across two, not just one “treatment”. Finally, to minimize impacts of culling, all models were estimated separately for males and females.

## RESULTS

### Baseline models

219 Table 3 shows that it is only among females that exposure to flu and to earthquake have  
 220 noticeable effects on both knee height and adjusted height. These effects are quite large, properly  
 221 signed, and associated with p- values less than [.01,.02], except for effects of earthquake  
 222 exposure on adjusted height. The reduction in knee height implied by the estimated effect of flu  
 223 exposure is about .33 of a standard deviation of knee height's and equivalent to .033 of the  
 224 observed mean (see Table 2). The corresponding quantities for exposure to earthquake are .23  
 225 and .022 respectively. The *relative* impacts on height are slightly smaller. As shown below,  
 226 estimates of effects for females are always large, systematic, robust, and lead to unequivocal  
 227 inferences. In contrast, estimates for males tend to be of smaller magnitude and less systematic.  
 228 For this reason, we only discuss estimates for females. It should be remembered that this contrast  
 229 was anticipated as part of the conjecture that males experience considerably more culling than  
 230 females. (To avoid cluttering, results for males are displayed in Table in S3 Table).

|                                         | Females             |                      | Males               |                      |
|-----------------------------------------|---------------------|----------------------|---------------------|----------------------|
|                                         | (1)                 | (2)                  | (3)                 | (4)                  |
| Variables                               | Knee                | Adj. height          | Knee                | Adj. height          |
| Years Education                         | 0.051<br>[1.599]    | 0.290<br>[5.842]     | 0.101<br>[2.482]    | 0.239<br>[3.569]     |
| Exposure Flu (1/0)                      | -1.082<br>[-2.048]  | -2.289<br>[-2.771]   | -1.016<br>[-1.425]  | 0.492<br>[0.421]     |
| Poverty Birthplace (1/0)                | -0.628<br>[-1.966]  | -0.284<br>[-0.569]   | -0.649<br>[-1.561]  | -0.038<br>[-0.055]   |
| Exposure Earthquake (1/0)               | -0.981<br>[-2.235]  | -1.092<br>[-1.590]   | -1.577<br>[-2.676]  | -0.786<br>[-0.814]   |
| Constant                                | 44.133<br>[136.824] | 153.771<br>[304.907] | 47.605<br>[115.279] | 165.589<br>[244.708] |
| Observations                            | 780                 | 780                  | 535                 | 535                  |
| R-squared                               | 0.022               | 0.058                | 0.039               | 0.026                |
| Log Likelihood                          | -4749               | -4749                | -3359               | -3359                |
| <i>Notes</i> : z-statistics in brackets |                     |                      |                     |                      |

231

## 232 **Models by severity of flu**

233 Table 4 displays results from models for females estimated separately by flu severity in  
 234 municipio of birth. These estimates are consistent with expectations as it is only among females  
 235 born in high severity municipios that we find large effects of flu exposure on both adjusted  
 236 height and knee height. Coefficients for knee height in high severity areas are at least twice as  
 237 large as those in the first model. Effects on adjusted height are smaller but still noteworthy and in  
 238 the expected direction.

Table 4: Models for females by flu severity of municipio of birth

|                                         | <b>High</b> |                    | <b>Low</b>  |                    |
|-----------------------------------------|-------------|--------------------|-------------|--------------------|
|                                         | (1)         | (2)                | (3)         | (4)                |
| <b>Variables</b>                        | <b>Knee</b> | <b>Adj. height</b> | <b>Knee</b> | <b>Adj. height</b> |
| Years Education                         | 0.190       | 0.306              | 0.018       | 0.294              |
|                                         | [2.883]     | [3.133]            | [0.517]     | [5.043]            |
| Exposure Flu (1/0)                      | -2.278      | -2.561             | -0.591      | -2.100             |
|                                         | [-2.202]    | [-1.671]           | [-0.992]    | [-2.144]           |
| Poverty Birthplace (1/0)                | -2.779      | -1.753             | 0.200       | 0.293              |
|                                         | [-4.631]    | [-1.972]           | [0.545]     | [0.485]            |
| Exposure Earthquake (1/0)               | -1.955      | -1.615             | 0.791       | -0.482             |
|                                         | [-3.253]    | [-1.815]           | [0.863]     | [-0.320]           |
| Constant                                | 44.585      | 154.627            | 43.971      | 153.446            |
|                                         | [72.401]    | [169.568]          | [119.700]   | [253.962]          |
| Observations                            | 219         | 219                | 561         | 561                |
| R-squared                               | 0.183       | 0.087              | 0.004       | 0.054              |
| Log Likelihood                          | -1321       | -1321              | -3407       | -3407              |
| <i>Notes</i> : z-statistics in brackets |             |                    |             |                    |

239

## 240 **A dangerous combo: the flu and the earthquake**

241 Table 5 shows results of models estimated separately among those who were born in  
 242 areas affected by the earthquake (high earthquake severity) and those born elsewhere (low  
 243 earthquake severity). Again, consistent with expectations, the effects on knee height are stronger

244 in areas hit by the earthquake. The magnitudes of effects on knee height among those born in  
 245 Puerto Rico's West coast are *three times larger* than those in previous models: knee reduction of  
 246 those doubly exposed (e.g. to flu and earthquake) is equivalent to almost 3.5 cms, or about .82 of  
 247 a standard deviation and .08 of mean knee height. The effects on adjusted height are noteworthy  
 248 in both areas only of smaller relative magnitude (.4 of a standard deviation and .02 of the mean).

|                                         | High     |             | Low       |             |
|-----------------------------------------|----------|-------------|-----------|-------------|
|                                         | (1)      | (2)         | (3)       | (4)         |
| Variables                               | Knee     | Adj. height | Knee      | Adj. height |
| Years Education                         | 0.279    | 0.351       | 0.018     | 0.282       |
|                                         | [2.871]  | [2.589]     | [0.548]   | [5.270]     |
| Exposure Flu (1/0)                      | -3.459   | -3.292      | -0.716    | -2.137      |
|                                         | [-2.187] | [-1.490]    | [-1.295]  | [-2.400]    |
| Poverty Birthplace (1/0)                | -1.721   | -0.337      | -0.429    | -0.273      |
|                                         | [-1.922] | [-0.269]    | [-1.271]  | [-0.502]    |
| Constant                                | 42.252   | 152.36      | 44.25     | 153.813     |
|                                         | [42.345] | [109.362]   | [133.465] | [287.905]   |
| Observations                            | 109      | 109         | 671       | 671         |
| R-squared                               | 0.159    | 0.085       | 0.006     | 0.052       |
| Log Likelihood                          | -657.3   | -657.3      | -4080     | -4080       |
| <i>Notes</i> : z-statistics in brackets |          |             |           |             |

249

250 These results suggest four inferences. First, the earthquake-tsunami and the flu pandemic  
 251 had important effects but mostly among females. Second, the impacts of the flu are strong on  
 252 knee height and in areas of high flu severity whereas those on height are less systematic. Third,  
 253 and consistent with the idea that the combination of the two events was most consequential for  
 254 the newly born and infants, the effects of flu exposure on knee height are two to three times  
 255 larger among those who were simultaneously exposed to the earthquake. The flu effects in non-  
 256 earthquake areas are in the proper direction but are of lesser magnitude. Given the definition of



257 exposure we use here, these findings are very likely the result of perturbations of both the fetal  
258 *and* the postnatal period.

## 259 **DISCUSSION**

260           There are two interpretations of our results that contradict our main conjecture. First,  
261 because our definition of exposure overlaps with the conventional definition, it could well be  
262 case that our estimates reflect impacts of *in utero* exposure, irrespective of postnatal experiences.  
263 To disprove this interpretation, we estimate models that include a dummy variable attaining the  
264 value 1 among those born in 1919. This is the definition used, among others, by Almond<sup>(10)</sup> If  
265 only fetal exposure mattered, the estimated effects of the dummy should reflect it—as they do in  
266 previous studies-- and the coefficient of our preferred exposure variable should drift to zero.  
267 Table 6 displays results from a model estimated among female born in areas hit by the  
268 earthquake. The estimate of our preferred measure of exposure shows no changes whereas the  
269 dummy for birth year drifts to zero and/or is improperly signed. Similar inferences can be drawn

270 from a model that uses quarter of birth (in 1919) as an index of fetal exposure.

**Table 6: Model with conventional definition of exposure: females**

|                                         | (1)         | (2)                |
|-----------------------------------------|-------------|--------------------|
| <b>Variables</b>                        | <b>Knee</b> | <b>Adj. height</b> |
| Years Education                         | 0.064       | 0.295              |
|                                         | [2.058]     | [6.071]            |
| Exposure Flu (1/0)                      | -1.368      | -2.085             |
|                                         | [-2.426]    | [-2.371]           |
| Year1919 (1/0)                          | 1.331       | -0.788             |
|                                         | [1.628]     | [-0.618]           |
| Constant                                | 43.630      | 153.487            |
|                                         | [161.404]   | [364.141]          |
| Observations                            | 780         | 780                |
| R-squared                               | 0.014       | 0.055              |
| LL                                      | -4752       | -4752              |
| <i>Notes</i> : z-statistics in brackets |             |                    |

271

272           Second, it is possible that our control variables (individual education and municipio's

273 poverty level) are insufficient to prevent contamination of estimates with the impact of

274 conditions other than the flu and the earthquake. To partially remove this artifact we re-estimate

275 the main models using municipios' fixed effects. The new estimates of impacts are now net of

276 municipios' conditions correlated with exposure to the two events that have independent effects

277 on nutritional status. Table 7 shows that the new estimates are *larger* than those in model with no

278 fixed effects and that the associated p-values drop to less than .001.

|                                                                                                             | Not severe |             | Severe   |             |
|-------------------------------------------------------------------------------------------------------------|------------|-------------|----------|-------------|
|                                                                                                             | (1)        | (2)         | (3)      | (4)         |
| Variables                                                                                                   | Knee       | Adj. height | Knee     | Adj. height |
| yeduca                                                                                                      | 0.468      | 0.248       | 0.324    | 0.474       |
|                                                                                                             | [1.395]    | [4.305]     | [3.541]  | [3.567]     |
| dummyF_1                                                                                                    | -0.778     | -3.935      | -3.980   | -2.720      |
|                                                                                                             | [-.446]    | [-1.880]    | [-2.744] | [-2.889]    |
| Constant                                                                                                    | 4.153      | 154.123     | 39.312   | 150.065     |
|                                                                                                             | [44.645]   | [89.390]    | [26.895] | [70.71]     |
| Observations                                                                                                | 464        | 464         | 109      | 109         |
| R-squared                                                                                                   | 0.017      | 0.023       | 0.327    | 0.209       |
| LL                                                                                                          | -3763      | -3763       | -637     | 637         |
| <i>Notes</i> : z-statistics in brackets                                                                     |            |             |          |             |
| Estimates of fixed effects omitted. Number of observations excludes cells with small number of observations |            |             |          |             |

279

## 280 A placebo test

281 An alternative way to corroborate the causal role of the 1918 pandemic is to conduct a  
282 "placebo test" and show that the exposure indicator used here is unrelated to nutritional status  
283 markers among individuals *who were not exposed to the pandemic and/or the earthquake*. An  
284 ideal placebo test is impossible since, after all, the 1918 flu was a pandemic and virtually the  
285 entire world was exposed to it. However, our sample includes individuals who were *not born* in  
286 Puerto Rico and, therefore, were not exposed to the earthquake. If results are an artifact of  
287 unobserved variables, we should observe similar effects among the foreign born as we do among  
288 Puerto Rican natives in earthquake areas. However, a model estimated among the foreign born  
289 suggests that the flu effects in areas struck by the earthquake are close to zero. We hasten to  
290 emphasize that the test is underpowered because the foreign born constitute a small fraction of  
291 our sample (5 percent). However, our conjecture would have been crushed had we retrieved  
292 effects of the flu of even moderate size among the foreign born.

293

## 294 **Systematic errors, small sample sizes and the role of chance**

295           Although estimates of effects on knee height are, by conventional standards, "statistically  
296 significant" (at levels  $p < .01$  or less), we intentionally avoided use of this expression. Instead we  
297 prefer to refer to them as worthy of notice (or not). We did this for two reasons. The first is that  
298 the estimates could be contaminated by systematic measurement of errors. The second is that  
299 they may be due to chance.

### 300 *Systematic errors*

301           We conducted two tests to assess the possibility of systematic underestimation of knee  
302 height among those exposed to the flu *and* born in areas impacted by the earthquake. First, the  
303 distribution of knee height shows no deviant extreme cases and the smallest values in earthquake  
304 areas are within 1.5 of a standard deviation. Second, in a more radical test we *ignored* the lowest  
305 values of knee height and re-estimated models. The key inference from this exercise is the  
306 following: to convert estimated effects from "worthy of notice" ( $p < [.01-.02]$ ) to mundane  
307 ( $p > .02$ ) we *need to exclude observations of knee height below the first quartile* of the  
308 distribution, a rather radical and also implausible surgery.

### 309 *The role of chance*

310           Most epidemiological and population health research highlights findings on the basis of  
311 classic- Fisher criteria, that is, based on *a priori* chosen significance level (say  $\alpha < .025$  in a two-  
312 tailed test). We are saying nothing new when we point out that this type of criterion can be  
313 highly misleading. This is of particular concern as extreme values of a statistic can be obtained

314 just by chance. To assess this possibility, we pursue two routes: (a) perform a permutation test  
315 <sup>(48)</sup> and (b) compute bounds for false discovery rates <sup>(49)</sup>.

316 *(a) Permutation test:* we implement the simplest of permutation tests and verify that it leads to  
317 the same inferences drawn from conventional hypothesis testing, namely, effects of knee height  
318 of the size we observe occur with probabilities lower than [.01-.02] (see Figure in S4 Text)

319 *(b) False discovery rate:* this is the *conditional* probability that if the null hypothesis is rejected,  
320 it is erroneously rejected. This quantity is usually quite different from the conventional  $\alpha$  as it is  
321 a function of  $\alpha$ , power, and the true magnitude of effects. Alternative values of these parameters  
322 produce results (see figure in S5 figure) that confirm our inferences. Indeed, given our p-values  
323 ([.01-.02]) and approximate power (.50-.60), the probability of uncovering effects only by  
324 chance is between .10 and .30, hardly a comforting range but quite common in clinical and  
325 population studies<sup>(51)</sup>.

326 *How large are the estimated effects?*

327 Is the size of the 1918 flu effects on survivors nutritional status significant? While our  
328 empirical findings confirm that flu exposure, in the broadest sense defined here, is robustly  
329 associated with markers of early nutritional status, it is unclear whether the magnitude of effects  
330 is substantively meaningful. To provide a sense of magnitude we compare predicted changes in  
331 individual stature associated with flu exposure with changes in stature throughout the period of  
332 mortality decline in Western Europe. Since there are no historical records of knee height, we  
333 exploit the fact that knee height is strongly associated with height and draw tentative inferences  
334 after predicting changes in height using estimated changes in knee height. Although the observed  
335 association between height and knee height in our sample is contaminated by systematic errors in

336 height due to skeletal compression, it is in all likelihood underestimated. Thus, the estimated  
337 slope of the regression of adjusted height on knee height is biased downwards and predicted  
338 values of height given knee height will be underestimated.

339         A log-log regression of adjusted height on knee height reveals that the reduction in height  
340 implied by the reduction in knee height due to flu and earthquake exposure estimated before (in  
341 the range 1.5- 6.5 cms) is associated with a proportionate adjusted height reduction of about  
342 .0243. To place this in context, consider this: it took forty years, between 1860 and 1900, for the  
343 mean height of the Dutch population to experience proportionate gains of about .012!.

344         A final piece of empirical evidence boosts the significance of the effects we find in the  
345 data. We use information on female respondents' inter-wave mortality and estimate a model  
346 including as predictor the variable knee-height. The effect of this variable is powerful as an  
347 increase of 1 cm in knee height translates into a *decrease* in mortality risks above age 75 of the  
348 order of 8 %. A decrease of this magnitude in life tables for the US during the period 2000-2010  
349 (the period of time covered by the PREHCO survey) is equivalent to an increase in female life  
350 expectancy at age 75 from 12 to 13 years over a period of 20 years. Since the reduction effect on  
351 knee height due to the flu and earthquake combined is within the range (1.5-6.5 cms), the  
352 implication is that survivors of these cohorts of females might have lost between .4 and 2.5 years  
353 of residual life expectancy or, equivalently, between 40 and 250 percent of the gains experienced  
354 in a period of 20 years. These are not trivial effects.

## 355 **CONCLUSION**

356         We argued that past research on the long-run effects of the 1918 influenza may be  
357 blindsided by a preoccupation with fetal exposure. Although there is strong evidence supporting

358 the idea that embryonic and other intrauterine disruptions are influential, fetal development is  
359 also about growth of cartilage, bone and muscle tissue, all of which are implicated *in subsequent*  
360 *postnatal physical development*. Furthermore, impairments in the fetal period can be aggravated  
361 if post-natal conditions are also unfavorable. This justifies our claim that the flu pandemic could  
362 have also perturbed the post-natal period and through both, fetal and postnatal exposures,  
363 affected children's nutritional status. Our estimates, particularly those for female in born in high  
364 severity areas and/or in earthquake-tsunami zones, are large, statistically "relevant", and robust to  
365 checks. This evidence does not imply that fetal exposure is irrelevant but that it, together with  
366 postnatal conditions, combine in a highly poisonous cocktail that impedes attainment of physical  
367 growth landmarks.

368         The paper has shortcomings. First, only one of two markers of nutritional status, knee  
369 height, is systematically responsive to flu/earthquake exposure. This could be due to the fact that  
370 adjusted height is more likely to be influenced by measurement errors than knee height. As a  
371 result, it is difficult to tell whether the unequal response could also be due to differences in  
372 physiological processes that underpin development of different parts of the human body. Second,  
373 the sample is small and vulnerable to produce effects where there are none. Unlike other  
374 research, we are not dealing with observations in the tens of thousands but with an effective  
375 sample size orders of magnitude below that. This does not favor strong model fit even though  
376 goodness of fit is always strongest in models with flu/earthquake exposure indicators. However,  
377 despite the noise, there is a strong and systematic signal that resists multiple checks. Admittedly,  
378 these checks can only suggest and will never prove that results are immune to false discovery  
379 and other aberrations produced by the data or by chance. Finally, a word about the target  
380 population. Puerto Rico is a tiny dot in a world map. Its population size has always been, then

381 and now, an infinitesimal fraction of the world population. Why would anybody bother with all  
382 of this? First, the unlikely collusion of two simultaneous natural disasters and the accidental  
383 availability of empirical records of survivors, generated a unique opportunity to identify effects  
384 of broadly defined early exposures to shocks. Second, we find stubborn empirical evidence  
385 suggesting that perhaps past research on the impacts of the 1918 flu pandemic may have missed  
386 something important: the influence of the combined disruption of fetal and postnatal life on the  
387 ultimate fate of subsequent physical growth. We are not so much trumpeting a new finding as we  
388 are identifying a relation that deserves a second look in future research with pandemics of similar  
389 nature.

390

## 391 **ACKNOWLEDGEMENTS**

392 We thank Bertie Lumey for helpful comments to the first draft of the manuscript.

393

394

## 395 **REFERENCES**

- 396 1. Helgertz J, Bengtsson T. The Long-Lasting Influenza: The Impact of Fetal Stress During  
397 the 1918 Influenza Pandemic on Socioeconomic Attainment and Health in Sweden,  
398 1968–2012. *Demography*. 2019 Aug 15;56(4):1389-425.
- 399 2. Enserink M. From Two Mutations, an Important Clue About the Spanish Flu. *2007*:582-  
400 282.
- 401 3. Chowell G, Simonsen L, Flores J, Miller MA, Viboud C. Death patterns during the 1918  
402 influenza pandemic in Chile. *Emerging infectious diseases*. 2014 Nov;20(11):1803.



- 403 4. ESPAÑA SY. Estimating Reproduction Numbers for the 1889-90 and 1918-20 Influenza  
404 Pandemics in the city of Madrid. 2010
- 405 5. Mamelund SE. Effects of the Spanish influenza pandemic of 1918-19 on later life  
406 mortality of Norwegian cohorts born about 1900. Memorandum; 2003.
- 407 6. Chowell G, Viboud C, Simonsen L, Miller MA, Acuna-Soto R. Mortality patterns  
408 associated with the 1918 influenza pandemic in Mexico: evidence for a spring herald  
409 wave and lack of preexisting immunity in older populations. *The Journal of infectious  
410 diseases*. 2010 Aug 15;202(4):567-75.
- 411 7. Johnson NP, Mueller J. Updating the accounts: global mortality of the 1918-1920"  
412 Spanish" influenza pandemic. *Bulletin of the History of Medicine*. 2002 Apr 1:105-15.
- 413 8. Vollmer S, Wójcik J. The long-term consequences of the global 1918 influenza  
414 pandemic: A systematic analysis of 117 IPUMS international census data sets. Available  
415 at SSRN 3083584. 2017 Dec 6.
- 416 9. Azambuja MI. Spanish flu and early 20th-century expansion of a coronary heart disease-  
417 prone subpopulation. *Texas Heart Institute Journal*. 2004;31(1):14.
- 418 10. Almond D. Is the 1918 influenza pandemic over? Long-term effects of in utero influenza  
419 exposure in the post-1940 US population. *Journal of political economy*. 2006  
420 Aug;114(4):672-712.
- 421 11. Mazumder B, Almond D, Park K, Crimmins EM, Finch CE. Lingering prenatal effects of  
422 the 1918 influenza pandemic on cardiovascular disease. *Journal of developmental origins  
423 of health and disease*. 2010 Feb;1(1):26-34.
- 424 12. Government US. Annual Reports of the War Department. Annual reports. Washington,  
425 D.C.: Government Printing Office; 1919. p. 220-24 cm.

- 426 13. Barker DJ, Eriksson JG, Forsén T, Osmond C. Fetal origins of adult disease: strength of  
427 effects and biological basis. *International journal of epidemiology*. 2002 Dec  
428 1;31(6):1235-9.
- 429 14. Barker DJ. *Mothers, babies, and health in later life*. Elsevier Health Sciences; 1998.
- 430 15. Gluckman PD. *The fetal matrix: evolution, development and disease*. Cambridge  
431 University Press; 2004.
- 432 16. Bateson P, Gluckman P. *Plasticity, Robustness, Development and Evolution*. 2011.
- 433 17. Gilbert SF, Epel D. *Ecological developmental biology: integrating epigenetics, medicine,*  
434 *and evolution*.
- 435 18. Coutant R, Carel JC, Letrait M, Bouvattier C, Chatelain P, Coste J, Chaussain JL. Short  
436 stature associated with intrauterine growth retardation: final height of untreated and  
437 growth hormone-treated children. *The Journal of Clinical Endocrinology & Metabolism*.  
438 1998 Apr 1;83(4):1070-4.
- 439 19. de Wit CC, Sas TC, Wit JM, Cutfield WS. Patterns of catch-up growth. *The Journal of*  
440 *pediatrics*. 2013 Feb 1;162(2):415-20.
- 441 20. Gluckman PD, Hanson MA. The developmental origins of health and disease. In *Early*  
442 *life origins of health and disease 2006* (pp. 1-7). Springer, Boston, MA.
- 443 21. Gluckman PD, Buklijas T, Hanson MA. The developmental origins of health and disease  
444 (DOHaD) concept: past, present, and future. In *The epigenome and developmental origins*  
445 *of health and disease 2016 Jan 1* (pp. 1-15). Academic Press.
- 446 22. Barker DJ, Osmond C, Law CM. The intrauterine and early postnatal origins of  
447 cardiovascular disease and chronic bronchitis. *Journal of Epidemiology & Community*  
448 *Health*. 1989 Sep 1;43(3):237-40.

- 449 23. Martorell R. The nature of child malnutrition and its long-term implications. Food and  
450 nutrition Bulletin. 1999;20(3):288-92.
- 451 24. Butz W, DaVanzo J, Habicht JP. Biological and behavioral influences on the mortality of  
452 Malaysian infants.
- 453 25. Palloni A, Millman S. Effects of inter-birth intervals and breastfeeding on infant and  
454 early childhood mortality. Population Studies. 1986 Jul 1;40(2):215-36.
- 455 26. Scrimshaw NS, SanGiovanni JP. Synergism of nutrition, infection, and immunity: an  
456 overview. The American journal of clinical nutrition. 1997 Aug 1;66(2):464S-77S.
- 457 27. Johansson SR, Mosk C. Exposure, resistance and life expectancy: disease and death  
458 during the economic development of Japan, 1900–1960. Population Studies. 1987 Jul  
459 1;41(2):207-35.
- 460 28. Mosley WH, Chen LC. An analytical framework for the study of child survival in  
461 developing countries. Population and development review. 1984 Jan 1;10:25-45.
- 462 29. Meaney MJ. Maternal care, gene expression, and the transmission of individual  
463 differences in stress reactivity across generations. Annual review of neuroscience. 2001  
464 Mar;24(1):1161-92.
- 465 30. Bentzinger CF, Wang YX, Rudnicki MA. Building muscle: molecular regulation of  
466 myogenesis. Cold Spring Harbor perspectives in biology. 2012 Feb 1;4(2):a008342.
- 467 31. Wu G, Bazer FW, Cudd TA, Meininger CJ, Spencer TE. Maternal nutrition and fetal  
468 development. The Journal of nutrition. 2004 Sep 1;134(9):2169-72.
- 469 32. Liu Q, Zhou YH, Yang ZQ. The cytokine storm of severe influenza and development of  
470 immunomodulatory therapy. Cellular & molecular immunology. 2016 Jan;13(1):3-10.

- 471 33. Silasi M, Cardenas I, Kwon JY, Racicot K, Aldo P, Mor G. Viral infections during  
472 pregnancy. *American journal of reproductive immunology*. 2015 Mar;73(3):199-213.
- 473 34. More VS. Fever in pregnancy and its maternal and fetal outcomes. *International Journal*  
474 *of Reproduction, Contraception, Obstetrics and Gynecology*. 2017;6(12):5523-7.
- 475 35. Lee J, Mirkes PE, Paik DJ, Kim WK. Effects of maternal hyperthermia on  
476 myogenesis-related factors in developing upper limb. *Birth Defects Research Part A:*  
477 *Clinical and Molecular Teratology*. 2009 Mar;85(3):184-92.
- 478 36. Young AP, Wagers AJ. Pax3 induces differentiation of juvenile skeletal muscle stem  
479 cells without transcriptional upregulation of canonical myogenic regulatory factors.  
480 *Journal of cell science*. 2010 Aug 1;123(15):2632-9.
- 481 37. World Health Organization. The optimal duration of exclusive breastfeeding: a  
482 systematic review. World Health Organization; 2001.
- 483 38. Ballard O, Morrow AL. Human milk composition: nutrients and bioactive factors.  
484 *Pediatric Clinics*. 2013 Feb 1;60(1):49-74.
- 485 39. Field CJ. The immunological components of human milk and their effect on immune  
486 development in infants. *The Journal of nutrition*. 2005 Jan 1;135(1):1-4.
- 487 40. Scrimshaw NS, Taylor CE, Gordon JE, World Health Organization. Interactions of  
488 nutrition and infection. World Health Organization; 1968.
- 489 41. Moore KL, Persaud TV, Torchia MG. *The Developing Human-E-Book: Clinically*  
490 *Oriented Embryology*. Elsevier Health Sciences; 2018 Dec 23.
- 491 42. Black RE, Allen LH, Bhutta ZA, Caulfield LE, De Onis M, Ezzati M, Mathers C, Rivera  
492 J, Maternal and Child Undernutrition Study Group. Maternal and child undernutrition:

- 493 global and regional exposures and health consequences. *The lancet*. 2008 Jan  
494 19;371(9608):243-60.
- 495 43. Karbownik K, Wray A. Long-run consequences of exposure to natural disasters. *Journal*  
496 *of Labor Economics*. 2019 Jul 1;37(3):949-1007.
- 497 44. Coale AJ, Demeny P, Vaughan B. *Regional model life tables and stable populations:*  
498 *studies in population*. Elsevier; 2013 Oct 22.
- 499 45. Palloni A, Winsborough HH, Scarano F. *Puerto Rico Census Project, 1910*. Ann Arbor,  
500 MI: Inter-university Consortium for Political and Social Research [distributor], 2006-01-  
501 16
- 502 46. Luk J, Gross P, Thompson WW. Observations on mortality during the 1918 influenza  
503 pandemic. *Clinical Infectious Diseases*. 2001 Oct 15;33(8):1375-8.
- 504 47. Clark VS. *Porto Rico and its problems*;1930.
- 505 48. Fisher RA. *The design of experiments*;1935.
- 506 49. Colquhoun D. An investigation of the false discovery rate and the misinterpretation of p-  
507 values. *Royal Society Open Science*. 2014 Nov 19;1(3):140216

508

509 SUPPORTING MATERIAL CAPTIONS

510 S1 Text: **FLU SEVERITY**

511 S2 Text : **ADJUSTED HEIGHT**

512 S3 Table: **MODELS FOR MALES**

513 S4 Text: **RESULTS OF PERMUTATION TEST**

514 S5 Figure: ALTERNATIVE RATES OF FALSE DISCOVERY

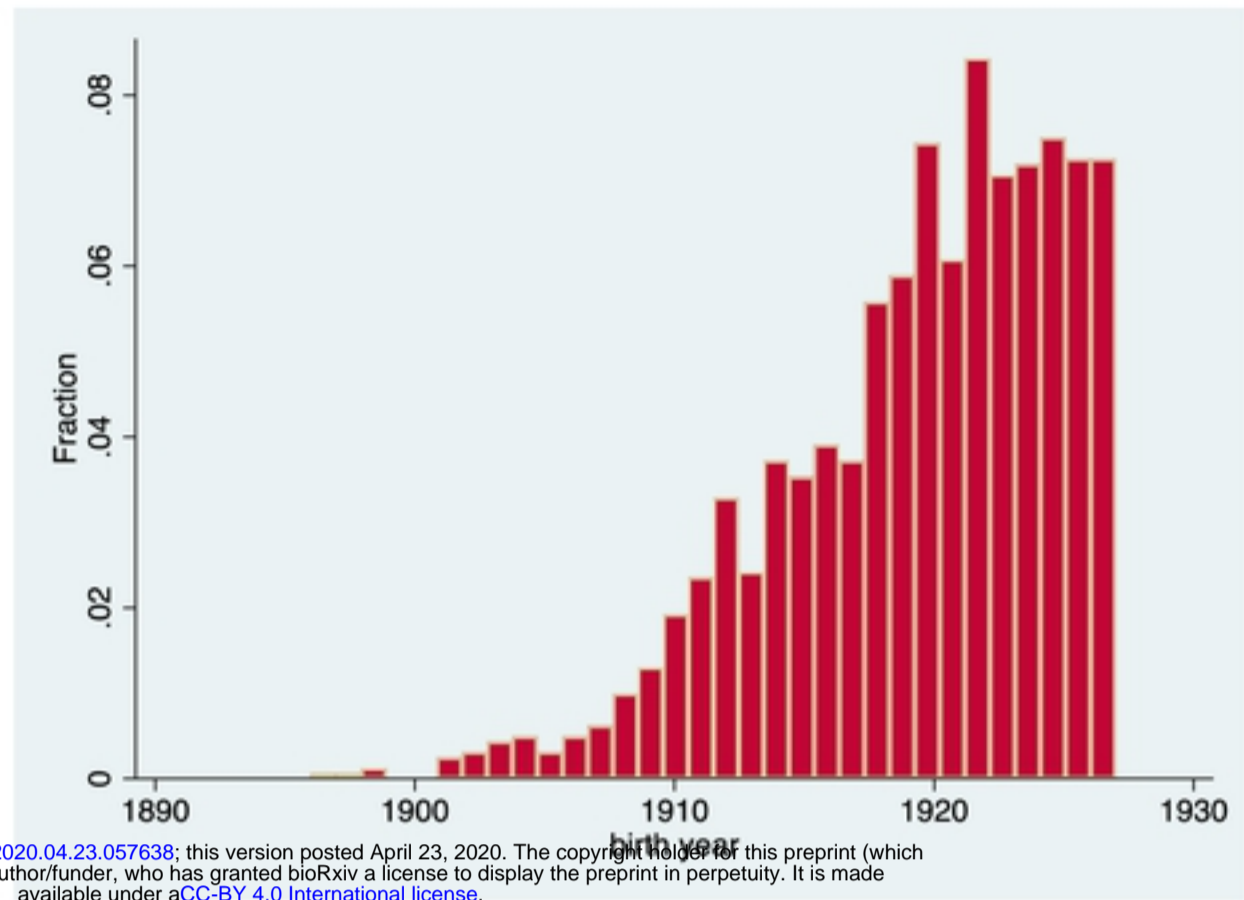

**Figure 1: Distribution of year of birth**
